# Supplementary material for: β-Cyclodextrin/Fe3O4 nanocomposites for an electrochemical non-enzymatic cholesterol sensor
Source: Royal Society of Chemistry journal article supplement (doi:10.1039/d0ay00933d), 2020-01-01
Supplement: d0ay00933d1.pdf [file d0ay00933d1.pdf]

## SUPPORTING INFORMATION

### $\beta$ -cyclodextrin/ $\text{Fe}_3\text{O}_4$ Nanocomposite for an Electrochemical Non-Enzymatic Cholesterol Sensor

Received 00th January 20xx,  
Accepted 00th January 20xx

Shella Jeniferiani Willyam, Endang Saepudin and Tribidasari Anggraningrum Ivandin

DOI: 10.1039/x0xx00000x

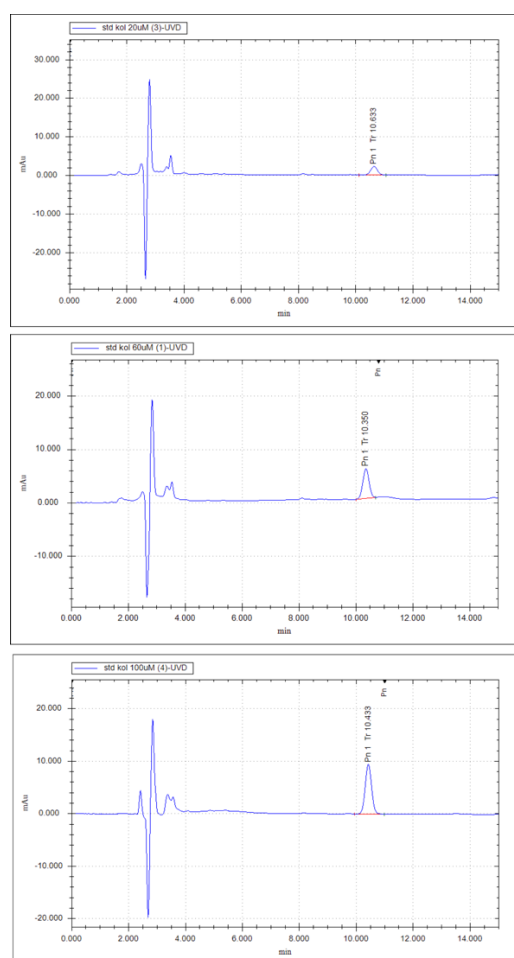

ES1. Typical chromatograms of the standard cholesterol solutions with concentrations of (a) 20  $\mu\text{M}$ , (b) 60  $\mu\text{M}$ , and (c) 100  $\mu\text{M}$ .

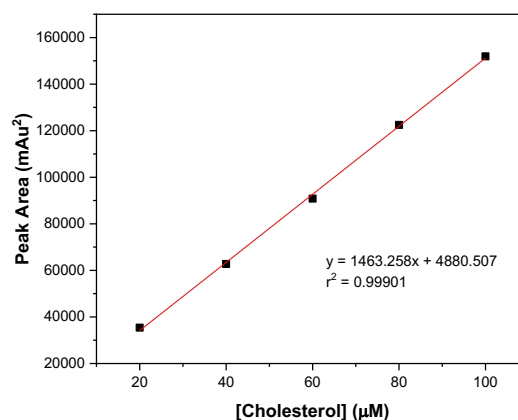

ES2. Linear dynamic range of the standard cholesterol solutions in various concentrations range between 20 and 100  $\mu\text{M}$  measured by HPLC method.

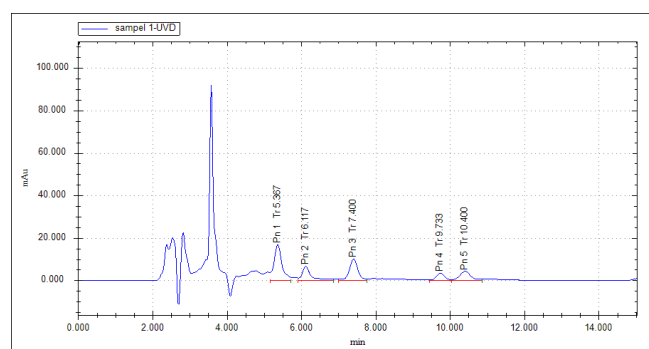

ES3. Chromatograms of the prepared milk sample.

Department of Chemistry, Faculty of Mathematics and Natural Sciences (FMIPA),  
Universitas Indonesia, Depok 16424, Indonesia.

† Footnotes relating to the title and/or authors should appear here.  
Electronic Supplementary Information (ESI) available: [details of any supplementary information available should be included here]. See DOI: 10.1039/x0xx00000x

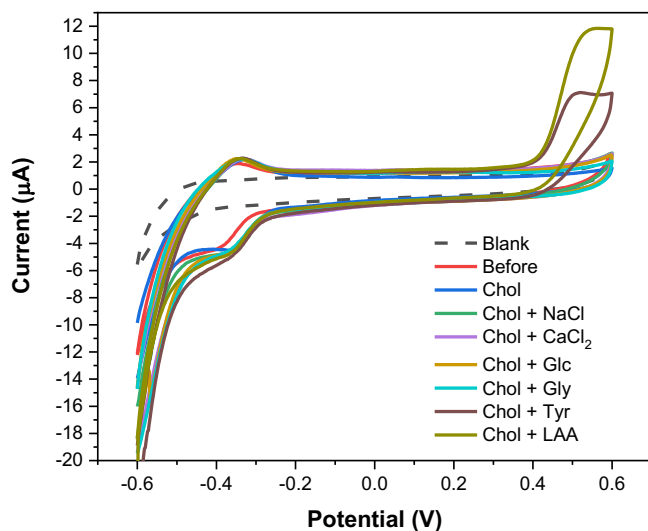

Figure ESI4. Cyclic voltammograms of cholesterol measurement (100 μM) at potential of -0.6 V – 0.6 V in PBS 50 mM pH 7.4

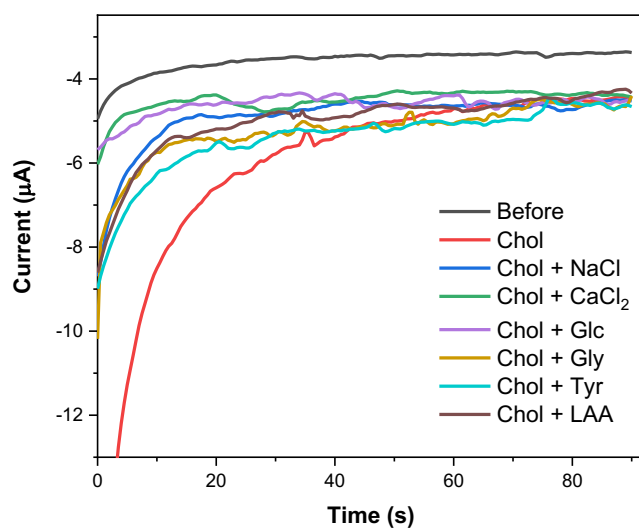

Figure ESI5. Amperograms of 100 μM standard cholesterol solutions at an applied potential of -0.43 V in 50 mM PBS pH 7.4 in the presence of 1 mM interfering agents
